# Supplementary material for: Effects of Dietary Rapeseed (Brassica napus), Hemp (Cannabis sativa) and Camelina (Camelina sativa) Seed Cakes Supplementation on Yolk and Albumen Colour and Nutritional Value of Yolk Lipids in Estonian Quail Eggs
Source: MDPI journal article supplement (doi:10.3390/ani12223110), 2022-11-10
Supplement: s1 [file s1]

**Table S1.** Composition of premix „Calvet“ (producer: Dolfos, Poland)

|                  | Units | Amount |
|------------------|-------|--------|
| Calcium          | g/kg  | 195.0  |
| Phosphorus       | g/kg  | 6.30   |
| Sodium           | g/kg  | 0.34   |
| Iron             | mg/kg | 153.60 |
| Zinc             | mg/kg | 44.10  |
| Vitamin A        | IU    | 640.00 |
| Vitamin E        | mg    | 3.00   |
| Vitamin B1       | mg    | 6.60   |
| Vitamin B2       | mg    | 19.90  |
| Vitamin B6       | mg    | 13.20  |
| Vitamin B12      | mg    | 0.02   |
| Biotin           | mg    | 0.88   |
| Nicotinic acid   | mg    | 226.40 |
| Pantothenic acid | mg    | 17.70  |
| Folic acid       | mg    | 8.80   |
| Lysine           | g/kg  | 17.90  |
| Methionine       | g/kg  | 3.80   |
| Cystine          | g/kg  | 1.80   |
| Threonine        | g/kg  | 11.80  |
| Tryptophan       | g/kg  | 2.20   |
| Isoleucine       | g/kg  | 11.00  |
| Tyrosine         | g/kg  | 21.00  |
| Phenylalanine    | g/kg  | 23.40  |
| Valine           | g/kg  | 11.70  |
| Choline          | g/kg  | 2.30   |
| Histidine        | g/kg  | 8.60   |
| Arginine         | g/kg  | 12.90  |
| Proline          | g/kg  | 4.50   |
| Asparagine       | g/kg  | 21.00  |
| Leucine          | g/kg  | 15.00  |
